# Supplementary material
Source: publisher figshare collection journal article supplement (https://acs.figshare.com/ndownloader/files/5755842)
Supplement: Supplementary file 1 [file 5755842]

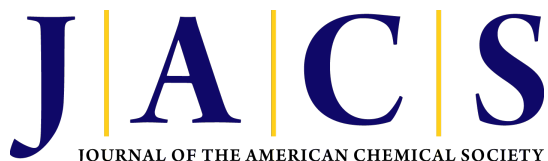

JOURNAL OF THE AMERICAN CHEMICAL SOCIETY

J. Am. Chem. Soc., 1997, 119(35), 8385-8386, DOI:[10.1021/ja971572v](https://doi.org/10.1021/ja971572v)

#### Terms & Conditions

Electronic Supporting Information files are available without a subscription to ACS Web Editions. The American Chemical Society holds a copyright ownership interest in any copyrightable Supporting Information. Files available from the ACS website may be downloaded for personal use only. Users are not otherwise permitted to reproduce, republish, redistribute, or sell any Supporting Information from the ACS website, either in whole or in part, in either machine-readable form or any other form without permission from the American Chemical Society. For permission to reproduce, republish and redistribute this material, requesters must process their own requests via the RightsLink permission system. Information about how to use the RightsLink permission system can be found at <http://pubs.acs.org/page/copyright/permissions.html>

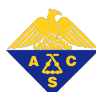

ACS Publications

MOST TRUSTED. MOST CITED. MOST READ.

Copyright © 1997 American Chemical Society

## A Highly Stereoselective Aza-[3,3]-Claisen Rearrangement of Vinylaziridines as a Novel Entry to Seven-Membered Lactams

Ulf M. Lindström and Peter Somfai\*

Organic Chemistry 2, Center for Chemistry and Chemical  
Engineering, Lund Institute of Technology, Lund University,  
P. O. Box 124, S-221 00 Lund, Sweden

### Supplementary Material

**General.** All infrared spectra were recorded on a Perkin-Elmer 298 infrared spectrophotometer and only the strongest/structurally most important peaks ( $\nu$ ,  $\text{cm}^{-1}$ ) are listed.  $^1\text{H}$  and  $^{13}\text{C}$  NMR spectra were recorded on Varian XL-300 or Bruker DRX 400 spectrometers using  $\text{CDCl}_3$  ( $\text{CHCl}_3$ ,  $\delta$  7.26) as solvent. Chemical shifts are reported in the  $\delta$  scale with multiplicity (b=broad, s=singlet, d=doublet, t=triplet, q=quartet and m=multiplet), integration, and coupling constants (Hz). Optical rotations,  $[\alpha]_D$ , were measured on a Perkin-Elmer 141 polarimeter at the sodium D line and at ambient temperature. High resolution mass spectra were recorded on a JEOL SX-102 spectrometer. Analytical thin layer chromatography was performed on Merck silica gel 60 F254 plates and the plates were visualised with UV light and the phosphomolybdic acid/cerium sulphate staining reagent.<sup>1</sup> Flash chromatography employed Grace Amicon silica gel 60 (35 - 70 mm). All reactions were carried out in oven-dried, septum-capped flasks, and under an atmospheric pressure of nitrogen. All liquid reagents were transferred *via* oven dried syringes. Tetrahydrofuran (THF) was distilled from sodium-benzophenone ketyl immediately before use; dichloromethane was distilled from  $\text{CaH}_2$ . Lithium hexamethyldisilazide ( $\text{LiHMDS}$ ) in hexanes was purchased from Aldrich and the exact concentration was determined by hydrolysing an aliquot of the base

---

<sup>1</sup> 25 g of phosphomolybdic acid/10 g of cerium sulphate/940 mL of water/60 mL of conc. sulfuric acid

(H<sub>2</sub>O:EtOH 1:1) and titrating against camphorsulfonic acid (CSA), with phenolphthalein as indicator.

**Representative experimental. Rearrangement of *N*-Acyl Vinylaziridine 4b into Tetrahydroazepinone 6b.** To a solution of the vinylaziridine **3b** (9.2 mg, 0.053 mmol), NEt<sub>3</sub> (0.015 mL, 0.106 mmol) and one crystal of DMAP in CH<sub>2</sub>Cl<sub>2</sub> (1 mL) was added Ac<sub>2</sub>O (0.006 mL, 0.059 mmol) at -78 °C. After 10 min, the reaction was quenched with phosphate buffer (pH 7), diluted with Et<sub>2</sub>O, and washed with water, sat. aq. NaHCO<sub>3</sub>, and brine. Drying (MgSO<sub>4</sub>) and concentration gave the crude *N*-acyl vinylaziridine, **4b**, which was taken on directly to the next step. <sup>1</sup>H NMR (300 MHz, CDCl<sub>3</sub>): δ 7.31-7.24 (m, 5H), 5.45-5.35 (m, 1H), 5.30-5.20 (m, 2H), 2.77 (m, 3H), 2.51 (dt, *J* = 6.3, 2.7 Hz), 2.06 (s, 3H), 1.98 (m, 2H), 1.74 (m, 2H); <sup>13</sup>C NMR (100 MHz, CDCl<sub>3</sub>): δ 181.7, 141.5, 134.6, 132.5, 128.9, 126.5, 120.5, 46.4, 43.9, 33.9, 33.7, 24.9; IR (neat) 3020, 2920, 2860, 1680 cm<sup>-1</sup>.

The crude aziridine from above was dissolved in THF (0.5 mL) and added to a solution of LiHMDS (0.096 mL, 0.106 mmol, 1.10 M in hexanes) in THF (0.5 mL) at -78 °C. After 20 min the cooling bath was removed, and after 20 min at RT the reaction was quenched with phosphate buffer (pH 7). The mixture was diluted with Et<sub>2</sub>O, washed with water, and then brine. Drying (MgSO<sub>4</sub>), concentration, and flash chromatography (heptane:ethyl acetate 7:1, 3% iPrNH<sub>2</sub>) of the residue gave **6b** (9.5 mg, 83% for two steps) as a low-melting solid. <sup>1</sup>H NMR (400 MHz, CDCl<sub>3</sub>): δ 7.35-7.17 (m, 5H), 6.12 (br s, 1H), 5.73 (m, 1H), 5.58 (br dd, 1H, *J* = 11.7, 2.5 Hz), 4.15 (br m, 1H), 2.91 (m, 1H), 2.74 (m, 2H), 2.41 (m, 3H), 1.91 (m, 2H); <sup>13</sup>C NMR (100 MHz, CDCl<sub>3</sub>): δ 176.8, 140.9, 130.8, 130.5, 129.1, 128.8, 126.7, 49.6, 37.9, 34.0, 32.3, 25.0; IR (KBr) 3210, 2910, 2860, 1670 cm<sup>-1</sup>; [α]<sub>D</sub> +236 (*c* 0.87, CHCl<sub>3</sub>); HRMS (EI+) Exact mass Calc for C<sub>14</sub>H<sub>17</sub>NO (M): 215.1310. Found: 215.1312.

***N*-Acyl Vinylaziridine 4a.** <sup>1</sup>H NMR (300 MHz, CDCl<sub>3</sub>): δ 7.39-7.24 (m, 5H), 5.54-5.28 (m, 3H), 4.59 (s, 2H), 3.71 (dd, 1H, *J* = 10.9, 4.1 Hz), 3.67 (dd, 1H, *J* = 10.9, 4.6 Hz), 3.08 (dd, 1H, *J* = 7.6, 2.7 Hz), 2.75 (ddd, 1H, *J* = 4.5, 2.8, 2.7 Hz), 2.09 (s, 3H); <sup>13</sup>C NMR (100 MHz, CDCl<sub>3</sub>): δ 181.5, 138.1, 134.3, 132.6, 132.5, 128.9, 128.3, 120.5, 73.4, 68.4, 43.3, 42.9, 24.7; IR (neat) 3400, 3060, 3030, 2980, 2920, 2860, 1680 cm<sup>-1</sup>.

***N*-Acyl Vinylaziridine 4c.** <sup>1</sup>H NMR (400 MHz, CDCl<sub>3</sub>): δ 7.32-7.18 (m, 5H), 5.40 (m, 1H), 5.24 (m, 2H), 2.79 (m, 2H), 2.52 (dt, 1H, *J* = 6.3, 2.8 Hz), 2.40 (dq,

1H,  $J = 15.1, 7.5$  Hz), 2.26 (dq, 1H,  $J = 16.5, 7.5$  Hz), 1.97 (m, 1H), 1.75 (m, 1H), 1.15 (t, 3H,  $J = 7.5$  Hz);  $^{13}\text{C}$  NMR (100 MHz,  $\text{CDCl}_3$ ):  $\delta$  185.5, 141.6, 134.8, 129.0, 128.9, 126.5, 120.1, 46.4, 43.5, 33.9, 33.8, 31.1, 9.5; IR (neat) 3030, 2980, 2930, 2860, 1690  $\text{cm}^{-1}$ .

***N*-Acyl Vinylaziridine 4d.**  $^1\text{H}$  NMR (400 MHz,  $\text{CDCl}_3$ ):  $\delta$  7.38-7.28 (m, 7H), 7.20 (m, 3H), 5.40-5.35 (m, 1H), 5.31-5.21 (m, 2H), 4.65 (d, 1H,  $J = 11.8$  Hz), 4.61 (d, 1H,  $J = 11.8$  Hz), 4.14 (d, 1H,  $J = 16.2$  Hz), 4.05 (d, 1H,  $J = 16.2$  Hz), 2.85-2.73 (m, 3H), 2.61 (dt, 1H,  $J = 6.4, 3.0$  Hz), 2.04 (m, 1H), 1.75 (m, 1H);  $^{13}\text{C}$  NMR (100 MHz,  $\text{CDCl}_3$ ):  $\delta$  181.1, 141.4, 137.7, 134.2, 134.1, 132.6, 129.5, 129.0, 128.9, 128.4, 126.5, 120.6, 73.7, 70.8, 46.7, 43.5, 33.7, 33.6; IR (neat) 3050, 3020, 2920, 2850, 1750, 1690  $\text{cm}^{-1}$ .

***N*-Acyl Vinylaziridine 4e.**  $^1\text{H}$  NMR (400 MHz,  $\text{CDCl}_3$ ):  $\delta$  7.32-7.18 (m, 5H), 5.43 (dd, 1H,  $J = 16.0, 1.9$  Hz), 5.27 (m, 2H), 5.13 (br s, 1H), 4.01 (dd, 1H,  $J = 18.2, 4.9$  Hz), 3.85 (dd, 1H,  $J = 18.2, 5.4$  Hz), 2.79 (m, 3H), 2.58 (dt, 1H,  $J = 6.3, 2.9$  Hz), 2.01 (m, 1H), 1.76 (m, 1H), 1.45 (s, 9H);  $^{13}\text{C}$  NMR (100 MHz,  $\text{CDCl}_3$ ):  $\delta$  180.2, 156.1, 141.3, 133.9, 129.1, 126.6, 126.2, 121.2, 46.8, 45.6, 43.8, 33.6, 28.8; IR (neat) 3340, 3060, 2970, 2920, 2850, 1690  $\text{cm}^{-1}$ .

***N*-Acyl Vinylaziridine 4f.**  $^1\text{H}$  NMR (300 MHz,  $\text{CDCl}_3$ ):  $\delta$  7.38-7.23 (m, 5H), 5.82 (ddq, 1H,  $J = 10.9, 7.0, 0.8$  Hz), 4.90 (m, 1H), 4.54 (s, 2H), 3.66 (dd, 2H,  $J = 4.7, 1.4$  Hz), 3.31 (dd, 1H,  $J = 9.5, 2.8$  Hz), 2.73 (dt, 1H,  $J = 4.6, 2.9$  Hz), 2.08 (s, 3H), 1.83 (dd, 3H,  $J = 7.1, 1.7$  Hz);  $^{13}\text{C}$  NMR (100 MHz,  $\text{CDCl}_3$ ):  $\delta$  181.8, 138.2, 132.6, 132.5, 132.4, 128.9, 128.2, 126.0, 73.4, 69.0, 43.2, 38.6, 24.8, 13.8; IR (neat) 3290, 3050, 3020, 2910, 2850, 1670  $\text{cm}^{-1}$ .

***N*-Acyl Vinylaziridine 4g.**  $^1\text{H}$  NMR (400 MHz,  $\text{CDCl}_3$ ):  $\delta$  7.38-7.29 (m, 5H), 6.04 (ddt, 1H,  $J = 15.5, 5.7, 0.4$  Hz), 5.32 (ddt, 1H,  $J = 15.5, 8.6, 1.5$  Hz), 4.52 (s, 2H), 4.03 (dd, 2H,  $J = 5.7, 1.5$  Hz), 2.82 (dd, 1H,  $J = 8.6, 2.8$  Hz), 2.55 (dq, 1H,  $J = 5.6, 2.8$  Hz), 2.09 (s, 3H), 1.33 (d, 3H,  $J = 5.6$  Hz);  $^{13}\text{C}$  NMR (100 MHz,  $\text{CDCl}_3$ ):  $\delta$  181.7, 138.4, 132.6, 132.4, 132.2, 129.5, 129.0, 128.9, 128.2, 72.9, 70.1, 45.7, 40.4, 25.0, 17.1; IR (neat) 3360, 3050, 3020, 2960, 2920, 2850, 1660  $\text{cm}^{-1}$ .

**Tetrahydroazepinone 6a.**  $^1\text{H}$  NMR (400 MHz,  $\text{CDCl}_3$ ):  $\delta$  7.40-7.29 (m, 5H), 6.14 (br s, 1H), 5.79 (m, 1H), 5.42 (dd, 1H,  $J = 11.6, 2.4$  Hz), 4.56 (s, 2H), 4.39 (br m, 1H), 3.52 (dd, 1H,  $J = 9.5, 4.4$  Hz), 3.43 (dd, 1H,  $J = 9.5, 8.5$  Hz), 2.90 (ddd,

1H,  $J = 5.1, 4.1, 3.1$  Hz), 2.52-2.30 (m, 3H);  $^{13}\text{C}$  NMR (100 MHz,  $\text{CDCl}_3$ ):  $\delta$  176.5, 137.6, 131.9, 129.0, 128.5, 128.3, 126.6, 73.7, 72.2, 50.3, 34.3, 25.0; IR (neat) 3360, 2910, 2860, 1660  $\text{cm}^{-1}$ ;  $[\alpha]_{\text{D}} -9.5$  ( $c$  1.31,  $\text{CHCl}_3$ ); HRMS (CI+) Exact mass Calc for  $\text{C}_{14}\text{H}_{18}\text{NO}_2$  (M+H): 232.1337. Found: 232.1335.

**Tetrahydroazepinone 6c.**  $^1\text{H}$  NMR (400 MHz,  $\text{CDCl}_3$ ):  $\delta$  7.35-7.17 (m, 5H), 5.82 (br s, 1H), 5.71 (m, 1H), 5.58 (ddd,  $J = 11.5, 6.8, 2.3$  Hz), 4.26 (br m, 1H), 3.09 (m, 1H), 2.73 (m, 2H), 2.22 (m, 2H), 1.87 (m, 2H), 1.16 (d, 3H,  $J = 6.6$  Hz);  $^{13}\text{C}$  NMR (100 MHz,  $\text{CDCl}_3$ ):  $\delta$  178.3, 140.9, 131.1, 130.7, 129.1, 128.8, 126.8, 48.9, 37.7, 35.4, 34.2, 32.2, 16.9; IR (KBr) 3210, 2910, 2860, 1670  $\text{cm}^{-1}$ ;  $[\alpha]_{\text{D}} +36.8$  ( $c$  1.26,  $\text{CHCl}_3$ ); HRMS (EI+) Exact mass Calc for  $\text{C}_{15}\text{H}_{19}\text{NO}$  (M): 229.1467. Found: 229.1468.

**Tetrahydroazepinone 6d.**  $^1\text{H}$  NMR (400 MHz,  $\text{CDCl}_3$ ):  $\delta$  7.41-7.16 (m, 10H), 6.03 (br d, 1H,  $J = 4.5$  Hz), 5.71 (m, 1H), 5.55 (ddd, 1H,  $J = 11.6, 7.2, 2.5$  Hz), 4.90 (d, 1H,  $J = 12.0$  Hz), 4.51 (t, 1H, 8.2 Hz), 4.47 (d, 1H,  $J = 12.0$  Hz), 4.05 (br m, 1H), 2.73 (m, 2H), 2.54 (m, 2H), 1.90 (m, 2H);  $^{13}\text{C}$  NMR (100 MHz,  $\text{CDCl}_3$ ):  $\delta$  174.5, 140.7, 138.1, 130.7, 129.1, 128.9, 128.8, 128.5, 128.2, 126.8, 73.2, 72.2, 48.7, 37.5, 32.7, 32.1; IR (KBr) 3210, 2910, 2860, 1670  $\text{cm}^{-1}$ ;  $[\alpha]_{\text{D}} -60.8$  ( $c$  1.01,  $\text{CHCl}_3$ ); HRMS (CI+) Calc for  $\text{C}_{21}\text{H}_{24}\text{NO}_2$  (M+H): 322.1807. Found: 322.1803.

**Tetrahydroazepinone 6e.**  $^1\text{H}$  NMR (400 MHz,  $\text{CDCl}_3$ ):  $\delta$  7.35-7.17 (m, 5H), 6.25 (br s, 1H), 5.77 (br d, 1H,  $J = 6.7$  Hz), 5.72 (m, 1H), 5.58 (dd, 1H,  $J = 11.5, 2.1$  Hz), 4.82 (m, 1H), 4.27 (br m, 1H), 2.73 (m, 3H), 2.23 (m, 1H), 1.91 (m, 2H), 1.46 (s, 9H);  $^{13}\text{C}$  NMR (100 MHz,  $\text{CDCl}_3$ ):  $\delta$  174.2, 155.5, 140.7, 130.4, 129.6, 129.2, 128.8, 126.8, 80.1, 50.3, 49.4, 37.6, 33.4, 32.2, 28.8; IR (KBr) 3420, 3210, 2980, 2930, 1700, 1670  $\text{cm}^{-1}$ ;  $[\alpha]_{\text{D}} +29.7$  ( $c$  0.99,  $\text{CHCl}_3$ ); HRMS (CI+) Exact mass Calc for  $\text{C}_{19}\text{H}_{27}\text{N}_2\text{O}_3$  (M+H): 331.2022. Found: 331.2015.

**Tetrahydroazepinone 6f.**  $^1\text{H}$  NMR (400 MHz,  $\text{CDCl}_3$ ):  $\delta$  7.35-7.27 (m, 5H), 6.06 (br s, 1H), 5.62 (ddd, 1H,  $J = 11.6, 6.6, 1.7$  Hz), 5.35 (ddd, 1H,  $J = 11.6, 5.0, 0.8$  Hz), 4.56 (m, 2H), 4.42 (m, 1H), 3.57 (dd,  $J = 9.5, 4.4$  Hz), 3.42 (dd, 1H,  $J = 9.5, 8.5$  Hz), 2.73 (t, 1H,  $J = 12.1$  Hz), 2.67 (m, 1H), 2.37 (ddd, 1H,  $J = 12.1, 6.2, 1.7$  Hz), 1.12 (d, 3H,  $J = 6.8$  Hz);  $^{13}\text{C}$  NMR (100 MHz,  $\text{CDCl}_3$ ):  $\delta$  175.5, 138.1, 137.6, 129.0, 128.5, 128.3, 125.3, 73.7, 72.1, 50.1, 42.2, 30.84, 23.2; IR (neat) 3360, 2910, 2860, 1660  $\text{cm}^{-1}$ ; HRMS (CI+) Exact mass Calc for  $\text{C}_{15}\text{H}_{20}\text{NO}_2$  (M+H): 246.1494. Found: 246.1494.

**Tetrahydroazepinone 6g.**  $^1\text{H}$  NMR (400 MHz,  $\text{CDCl}_3$ ):  $\delta$  7.38-7.27 (m, 5H), 5.71 (m, 1H), 5.63-5.50 (m, 2H), 4.60 (d, 1H,  $J = 11.9$  Hz), 4.52 (d, 1H,  $J = 11.9$  Hz), 4.30 (m, 1H), 3.48 (d, 2H,  $J = 6.7$  Hz), 3.00 (dd, 1H,  $J = 13.3, 4.0$  Hz), 2.76 (m, 1H), 2.60 (ddt, 1H,  $J = 13.3, 5.4, 1.5$  Hz), 1.30 (d, 3H,  $J = 7.1$  Hz);  $^{13}\text{C}$  NMR (100 MHz,  $\text{CDCl}_3$ ):  $\delta$  174.5, 138.7, 132.9, 132.6, 132.4, 131.6, 129.0, 128.8, 128.1, 128.0, 73.8, 73.4, 46.0, 36.4, 36.0, 22.6; IR (neat) 3390, 2920, 2860, 1660  $\text{cm}^{-1}$ ; HRMS (CI+) Exact mass Calc for  $\text{C}_{15}\text{H}_{20}\text{NO}_2$  (M+H): 246.1494. Found: 246.1485.
